# Supplementary material for: Status of Infectious Diseases in Free-Ranging European Brown Hares (Lepus europaeus) Found Dead between 2017 and 2020 in Schleswig-Holstein, Germany
Source: MDPI journal article supplement (doi:10.3390/pathogens12020239), 2023-02-02
Supplement: s1 [file s1]

## Supplements

## Lagomorpha-dissection protocol

Dissection team: .....

Diss.-Nr.: ..... Spec.: ..... Total length: ..... cm  
Date of finding: ..... Dissection date: ..... Weight: ..... g  
Location of finding: ..... Sex: ☐ male ☐ female  
Finder: .....

**Origin:** ☐ Hunted **Age:** ☐ positive (juvenil) **Decomp. Grade** ☐ (1-5) ☐ Photo  
(Sign of Stroh)  
☐ Deceased ☐ negative (adult) ☐ unfrozen  
☐ Road kill ☐ uncertain ☐ frozen

**Anamnesis:**

Sampling day:

☐ Serum [      ml] Plasma [     ml]☐ Eyes (ri le )☐ Urine sample☐ Additional

|                                                                             |     |     |     |
|-----------------------------------------------------------------------------|-----|-----|-----|
| <b>Measurements [cm]</b>                                                    |     |     |     |
| Axillary girth [AU]:                                                        |     |     |     |
| Total length (TL):<br>Dorsal recumbency, neck stretched, nose tip till anus |     |     |     |
| Ear length (OL)                                                             |     |     |     |
| Hindfoot length (HL) plantar, without claws                                 |     |     |     |
| Tail length (SL) Tail tip until anus                                        |     |     |     |
| <b>Organ weights [g]</b>                                                    |     |     |     |
| Liver:                                                                      |     |     |     |
| Spleen:                                                                     |     |     |     |
| Heart (frinse first):                                                       |     |     |     |
| Brain:                                                                      |     |     |     |
| Retro. Fat:                                                                 |     |     |     |
| Kidney:                                                                     | le: | ri: |     |
| Adrenal gland:                                                              | le: | ri: |     |
| Thyroid:                                                                    | le: | ri: |     |
| Testis + epididymal:                                                        | le: | ri: |     |
| Testis w/o epididymal:                                                      | le: | ri: |     |
| Ovaries:                                                                    | le: | ri: |     |
| <b>Measurements Uterus/Ovaries/Testes [cm]</b>                              |     |     |     |
| Ovary (ri):                                                                 | L:  | W:  | H:  |
| Ovary (le):                                                                 | L:  | W:  | H:  |
| Uterus (diameter; change to bifurcation):                                   |     |     |     |
| Placental scars:                                                            | le: |     | ri: |
| Testis + epididymal (ri):                                                   | L:  | W:  | H:  |
| Testis + epididymal (le):                                                   | L:  | W:  | H:  |
| Testis w/o epididymal (ri):                                                 | L:  | W:  | H:  |
| Testis w/o epididymal (le):                                                 | L:  | W:  | H:  |

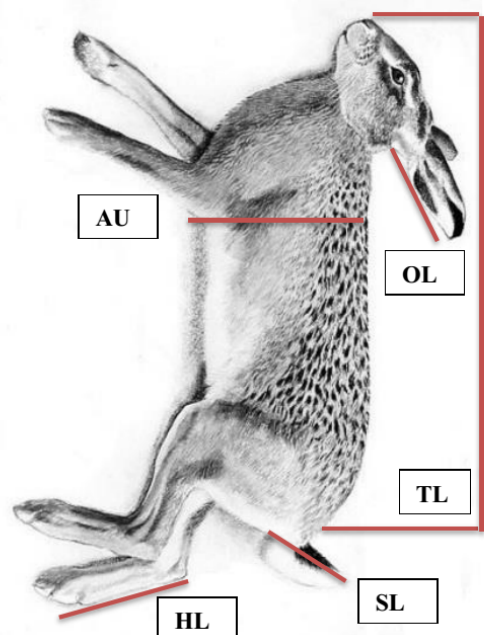

Diss.-Nr:

**Nutritional status:** ☐ good ☐ moderate ☐ poor  
**Musculature:** ☐ good ☐ moderate ☐ poor  
**Retro. fat:** ☐ good ☐ moderate ☐ poor

**Dental abrasion:**

**Urinary bladder:** ☐ full ☐ empty ☐ urine collected

|                            |                               |               |                               |                               |                               |
|----------------------------|-------------------------------|---------------|-------------------------------|-------------------------------|-------------------------------|
| <b>Parasites:</b>          |                               |               |                               |                               |                               |
| Lung (rinse over sieve)    | None <input type="checkbox"/> |               |                               |                               |                               |
|                            | Location:                     | Bronchi       | mild <input type="checkbox"/> | mod. <input type="checkbox"/> | sev. <input type="checkbox"/> |
|                            |                               | Vessels       | mild <input type="checkbox"/> | mod. <input type="checkbox"/> | sev. <input type="checkbox"/> |
|                            |                               |               |                               |                               |                               |
| Heart (rinse over sieve)   | None <input type="checkbox"/> |               |                               |                               |                               |
|                            | Location:                     | ri. Atrium    | mild <input type="checkbox"/> | mod. <input type="checkbox"/> | sev. <input type="checkbox"/> |
|                            |                               | ri. Ventricle | mild <input type="checkbox"/> | mod. <input type="checkbox"/> | sev. <input type="checkbox"/> |
|                            |                               | le. Atrium    | mild <input type="checkbox"/> | mod. <input type="checkbox"/> | sev. <input type="checkbox"/> |
|                            |                               | le. Ventricle | mild <input type="checkbox"/> | mod. <input type="checkbox"/> | sev. <input type="checkbox"/> |
|                            |                               |               |                               |                               |                               |
| Stomach (rinse over sieve) | None <input type="checkbox"/> |               |                               |                               |                               |
|                            | Location:                     |               | mild <input type="checkbox"/> | mod. <input type="checkbox"/> | sev. <input type="checkbox"/> |
|                            |                               |               |                               |                               |                               |
| Intestine                  | None <input type="checkbox"/> |               |                               |                               |                               |
|                            | Location:                     | Duodenum      | mild <input type="checkbox"/> | mod. <input type="checkbox"/> | sev. <input type="checkbox"/> |
|                            |                               | Jejunum       | mild <input type="checkbox"/> | mod. <input type="checkbox"/> | sev. <input type="checkbox"/> |
|                            |                               | Ileum         | mild <input type="checkbox"/> | mod. <input type="checkbox"/> | sev. <input type="checkbox"/> |
|                            |                               | Caecum        | mild <input type="checkbox"/> | mod. <input type="checkbox"/> | sev. <input type="checkbox"/> |
|                            |                               | Colon         | mild <input type="checkbox"/> | mod. <input type="checkbox"/> | sev. <input type="checkbox"/> |
|                            |                               |               |                               |                               |                               |
| Liver (rinse over sieve)   | None <input type="checkbox"/> |               |                               |                               |                               |
|                            | Location:                     |               | mild <input type="checkbox"/> | mod. <input type="checkbox"/> | sev. <input type="checkbox"/> |
|                            |                               |               |                               |                               |                               |
| Skin/Fur                   | None <input type="checkbox"/> |               |                               |                               |                               |
|                            | Location:                     |               | mild <input type="checkbox"/> | mod. <input type="checkbox"/> | sev. <input type="checkbox"/> |

**Notes:**

**Sampling Lagomorpha**

|                                                           |                                                             |                                                           |                                              |
|-----------------------------------------------------------|-------------------------------------------------------------|-----------------------------------------------------------|----------------------------------------------|
| <b>Age determination (formalin 10%; room temperature)</b> |                                                             | <b>Reproduction (container with H<sub>2</sub>O; -20°)</b> |                                              |
|                                                           | Eyes ri + le                                                |                                                           | Vagina, Uterus                               |
| <b>Parasites (70% Alcohol)</b>                            |                                                             | <b>Microbiology (swab or tissue, cooled)</b>              |                                              |
|                                                           | Lung                                                        |                                                           | Swab lung                                    |
|                                                           | Stomach                                                     |                                                           | Swab small intestine                         |
|                                                           | Intestine                                                   |                                                           | Spleen (tissue)                              |
|                                                           | Liver                                                       |                                                           | Liver (tissue)                               |
|                                                           | Heart                                                       |                                                           | Kidney (tissue)                              |
|                                                           | Skin/ Fur                                                   |                                                           | Brain (tissue)                               |
|                                                           | Faeces (ca. 8g, container, cooled)                          |                                                           | Mesent. Lymphn. (tissue)                     |
|                                                           |                                                             |                                                           | Lung                                         |
|                                                           |                                                             |                                                           | Small Intestine                              |
| <b>Histo (Formalin 10%)</b>                               |                                                             | <b>Retained samples (plastic bag; -80°C)</b>              |                                              |
|                                                           | Lung (6x: both lobes 1x cran. med., caud., respect.)        |                                                           | Lung                                         |
|                                                           | Heart                                                       |                                                           | Heart                                        |
|                                                           | Liver (le/ri)                                               |                                                           | Liver                                        |
|                                                           | Spleen                                                      |                                                           | Spleen                                       |
|                                                           | Muscle                                                      |                                                           | Muscle                                       |
|                                                           | Retroperit. Fat                                             |                                                           | Retro. Fat                                   |
|                                                           | Kidney (le/ri)                                              |                                                           | Brain                                        |
|                                                           | Mesent. Lymphn.                                             |                                                           | Kidney                                       |
|                                                           | Small Intestine (Jejunum, Duodenum)                         |                                                           | Mesent. Lymphn.                              |
|                                                           | Large Intestine (Caecum, Colon)                             |                                                           | Small Intestine                              |
|                                                           | Adrenal glands (le/ri)                                      |                                                           | Large Intestine                              |
|                                                           | Thyroid gland                                               |                                                           | Cranial bone (half)                          |
|                                                           | Bone marrow (broken femur)                                  |                                                           | Gonads                                       |
|                                                           | Cranial bone (half)                                         |                                                           |                                              |
|                                                           | Gonads (testis/ovaries)                                     |                                                           |                                              |
|                                                           | Thymus                                                      |                                                           | <b>Dietary analysis (plastic bag, -20°C)</b> |
|                                                           | Pancreas                                                    |                                                           | Stomach contents                             |
|                                                           | Stomach                                                     |                                                           |                                              |
|                                                           | Trachea                                                     |                                                           | <b>Toxicology (urine container, -80°C)</b>   |
|                                                           | Aorta                                                       |                                                           | Urine                                        |
|                                                           | Spinal cord                                                 |                                                           |                                              |
|                                                           | Brain                                                       |                                                           |                                              |
|                                                           |                                                             |                                                           |                                              |
|                                                           | A: Liver (ri/le), Kidney (ri/le)                            |                                                           |                                              |
|                                                           | B: Spleen, Mesent. Lymphn., Heart, Retro. Fat               |                                                           |                                              |
|                                                           | C: Adrenal (ri/le), Mesent. Lymphn., Small Int., Large Int. |                                                           |                                              |
|                                                           | D: Brain                                                    |                                                           |                                              |
|                                                           | E: Lung (6)                                                 |                                                           |                                              |
|                                                           | F: Trachea, Aorta, Stomach, Pancreas                        |                                                           |                                              |
|                                                           |                                                             |                                                           |                                              |
| <b>OIE Italy (EBHS/RHD2)</b>                              |                                                             |                                                           |                                              |
|                                                           | Serum (-20°) 1 ml                                           |                                                           |                                              |
|                                                           | Liver (Eppendorf) cooled                                    |                                                           |                                              |
|                                                           |                                                             |                                                           |                                              |
| <b>FLI JENA (Tularemia)</b>                               |                                                             |                                                           |                                              |
|                                                           | Liver (Eppendorf) cooled                                    |                                                           |                                              |
|                                                           | Spleen (Eppendorf) cooled                                   |                                                           |                                              |
|                                                           |                                                             |                                                           |                                              |
|                                                           | Sampling on day of hunt or finding/ when not frozen         |                                                           |                                              |

Figure S1: Lagomorpha dissection and sampling protocol.

Table S1: Incidence of pathomorphological findings of European brown hares and the yearly distribution. Total percentages are given only for routinely collected histopathological samples or macroscopic detectable alterations.

| <b>Morphological findings</b>        | <b>2017</b> | <b>2018</b> | <b>2019</b> | <b>2020</b> | <b>Total</b> | <b>Total %</b> |
|--------------------------------------|-------------|-------------|-------------|-------------|--------------|----------------|
| <b>Alimentary system</b>             |             |             |             |             |              |                |
| Dental displacement                  |             |             |             | 1           | 1            | 0.8            |
| Stomatitis                           | 1           |             |             |             | 1            |                |
| Gastric amyloidosis                  | 1           |             |             | 3           | 4            | 9.8            |
| Gastritis                            |             |             |             | 1           | 1            | 2.4            |
| Gastric haemorrhages                 | 1           | 1           | 1           |             | 3            | 7.3            |
| Intestinal amyloidosis               |             |             | 1           | 4           | 5            | 4.5            |
| Intestinal haemorrhages              | 1           |             |             | 1           | 2            | 1.8            |
| Enteritis                            | 23          | 3           | 5           | 17          | 48           | 40.7           |
| Intestinal fibrosis                  |             |             | 1           |             | 1            | 0.9            |
| Parasites in intestine               | 36          | 2           | 10          | 19          | 67           | 60.4           |
| Hepatic amyloidosis                  | 3           |             |             | 4           | 7            | 6.0            |
| Hepatic haemorrhages                 | 1           |             |             |             | 1            | 0.9            |
| Hepatic fibrosis                     | 4           | 1           | 1           | 1           | 7            | 6.0            |
| Kupffer cell haemosiderosis          |             |             |             | 1           | 1            | 0.9            |
| Hepatitis                            | 13          | 3           | 7           | 15          | 38           | 32.8           |
| Hepatolipidosis                      | 1           |             |             | 4           | 5            | 4.3            |
| Liver necrosis                       | 2           | 1           | 9           | 3           | 15           | 12.9           |
| Hepatic tumour metastasis            | 1           | 1           |             |             | 2            | 1.7            |
| Bile duct proliferation              |             |             | 1           | 1           | 2            | 1.7            |
| Cholangitis                          |             |             |             | 1           | 1            | 0.9            |
| Pancreatic amyloidosis               | 1           |             |             | 1           | 2            | 11.1           |
| Pancreatic fibrosis                  |             |             | 1           |             | 1            | 5.6            |
| Pancreas neoplasia                   | 1           |             |             |             | 1            | 5.6            |
| <b>Cardiovascular system</b>         |             |             |             |             |              |                |
| Vasculitis                           |             |             |             | 3           | 3            |                |
| Thrombosis                           | 1           |             |             | 2           | 3            |                |
| Epicarditis                          | 2           |             |             | 2           | 4            | 3.5            |
| Endocardial haemorrhages             |             |             |             | 1           | 1            | 0.9            |
| Endocardial oedema                   |             |             |             | 1           | 1            | 0.9            |
| Myocarditis                          | 1           |             |             | 1           | 2            | 1.8            |
| Cardial parasitosis                  | 1           |             |             |             | 1            | 0.9            |
| Endocardiosis                        |             |             |             | 1           | 1            | 0.9            |
| <b>Abdominal and thoracic cavity</b> |             |             |             |             |              |                |
| Haemoabdomen                         | 2           | 1           |             | 3           | 6            | 5.1            |
| Haemothorax                          |             | 1           |             | 3           | 4            | 3.4            |
| Steatitis                            | 2           | 3           | 2           | 2           | 9            | 20.9           |
| Pericardial steatitis                |             |             |             | 1           | 1            | 0.9            |
| Pleura fibrosis                      | 1           | 1           |             |             | 2            | 1.7            |
| Peritonitis                          | 1           |             |             | 1           | 2            | 1.7            |
| Pleuritis                            | 2           |             |             | 1           | 3            | 2.5            |

| <b>Morphological findings</b>              | <b>2017</b> | <b>2018</b> | <b>2019</b> | <b>2020</b> | <b>Total</b> | <b>Total %</b> |
|--------------------------------------------|-------------|-------------|-------------|-------------|--------------|----------------|
| Trauma/perforation                         |             |             |             | 6           | 6            | 5.1            |
| <b>Haematopoietic and endocrine system</b> |             |             |             |             |              |                |
| Osteomyelitis                              |             |             |             | 1           | 1            |                |
| Lymph node/ Peyer`s patches hyperplasia    | 2           |             | 1           | 6           | 9            | 8.1            |
| Lymphadenitis                              | 2           | 2           |             | 4           | 8            | 7.5            |
| Lymph node necrosis                        |             |             | 1           |             | 1            | 0.9            |
| Lymphonodal tumour metastasis              |             | 1           | 1           |             | 2            | 1.9            |
| Lymphonodal sinus histiocytosis            |             |             |             | 1           | 1            | 0.9            |
| Splenic amyloidosis                        | 2           |             |             | 6           | 8            | 7.4            |
| Splenic hyperplasia                        | 3           |             |             | 4           | 7            | 6.5            |
| Splenic haemosiderosis                     | 10          | 1           | 2           | 3           | 16           | 14.8           |
| Splenitis                                  | 1           | 2           | 1           | 2           | 7            | 5.6            |
| Splenic necrosis                           |             |             |             | 1           | 1            | 0.9            |
| Adrenitis                                  | 3           | 2           |             | 1           | 6            | 5.5            |
| Adrenal amyloidosis                        | 5           |             |             | 5           | 10           | 9.1            |
| Adrenal adenoma                            |             | 1           |             |             | 1            | 0.9            |
| Adrenal atrophy                            | 1           |             |             | 1           | 2            | 1.8            |
| Adrenal haemorrhages                       |             |             |             | 1           | 1            | 0.9            |
| <b>Musculoskeletal system</b>              |             |             |             |             |              |                |
| Mesenchymal tumour                         | 1           |             |             |             | 1            | 0.9            |
| Bone fracture                              | 4           | 2           |             | 4           | 10           | 8.5            |
| Disarticulation                            |             |             |             | 1           | 1            | 0.9            |
| Limb stump                                 |             |             | 1           |             | 1            | 0.9            |
| Muscular haemorrhages                      |             | 1           |             | 2           | 3            | 2.5            |
| Myositis                                   | 1           | 1           | 1           | 3           | 6            | 5.2            |
| Muscular parasitosis                       |             |             | 1           |             | 1            | 0.9            |
| <b>Respiratory system</b>                  |             |             |             |             |              |                |
| Pulmonary atelectasis                      |             |             |             | 5           | 5            | 4.3            |
| Pulmonary haemorrhages                     | 5           | 1           | 3           | 3           | 10           | 8.5            |
| Bronchiectasis                             | 2           |             |             | 3           | 5            | 4.3            |
| Bronchitis                                 |             |             |             | 3           | 3            | 2.6            |
| Pneumonia                                  | 10          | 2           | 3           | 11          | 26           | 22.2           |
| Lung fibrosis                              | 1           |             |             |             | 1            | 0.9            |
| Tumour metastasis                          | 1           |             |             |             | 1            | 0.9            |
| Tracheal haemorrhages                      |             |             |             | 5           | 5            | 4.2            |
| Tracheitis                                 |             |             |             | 7           | 7            | 21.9           |
| Diaphragmatic rupture                      | 1           |             |             | 2           | 3            | 2.5            |
| <b>Skin and subcutis</b>                   |             |             |             |             |              |                |
| Dermatitis                                 | 1           |             | 1           | 6           | 8            |                |
| Skin lesion                                | 8           |             |             | 1           | 9            | 7.6            |
| Epidermal hyperkeratosis                   |             |             |             | 3           | 3            |                |
| Skin tumour                                | 1           |             |             |             | 1            | 0.8            |
| Mastitis                                   |             |             |             | 2           | 2            |                |
| Fat tissue necrosis                        |             |             |             | 1           | 1            |                |
| Panniculitis                               | 1           |             |             |             | 1            |                |

| <b>Morphological findings</b>     | <b>2017</b> | <b>2018</b> | <b>2019</b> | <b>2020</b> | <b>Total</b> | <b>Total %</b> |
|-----------------------------------|-------------|-------------|-------------|-------------|--------------|----------------|
| Subcutaneous haematoma            | 10          | 2           | 3           | 5           | 20           | 16.9           |
| <b>Urinary and genital system</b> |             |             |             |             |              |                |
| Pyometra                          | 3           |             |             |             | 3            |                |
| Uterine metastasis                | 1           |             |             |             | 1            |                |
| Orchitis                          | 1           |             |             |             | 1            |                |
| Renal amyloidosis                 | 4           |             | 1           | 4           | 9            | 7.8            |
| Renal fibrosis                    |             | 1           | 3           | 1           | 5            | 4.3            |
| Nephritis                         | 8           | 2           | 5           | 7           | 22           | 19.1           |
| Nephrohydrosis                    |             |             | 2           | 1           | 3            | 2.6            |
| Nephrolithiasis                   |             | 1           | 1           |             | 2            | 1.7            |
| Intratubular protein casts        | 1           | 1           | 4           | 4           | 10           | 8.7            |
| Renal metastasis                  |             | 1           |             |             | 1            | 0.9            |
| Renal sclerosis                   |             |             | 2           | 1           | 3            | 2.6            |
| Tubulonephrosis                   |             |             | 1           |             | 1            | 0.9            |
| Tubulonecrosis                    |             |             | 3           | 1           | 4            | 3.5            |
| Renal tumour                      | 1           |             |             |             | 1            | 0.9            |
| Ovarian tumour                    | 1           |             |             |             | 1            |                |
| Balantitis                        |             |             |             | 1           | 1            |                |

Table S2: Detected bacterial and fungal microorganisms with regard to their organ localization in deceased hares.

| <b>Bacteria/ Fungi</b>               | <b>Brain</b> | <b>Heart</b> | <b>Intestine</b> | <b>Kidney</b> | <b>Liver</b> | <b>Lung</b> | <b>Mesenteric lymph node</b> | <b>Reproductive system</b> | <b>Skeletal muscle</b> | <b>Skin</b> | <b>Spleen</b> | <b>Trachea</b> | <b>Total</b> |
|--------------------------------------|--------------|--------------|------------------|---------------|--------------|-------------|------------------------------|----------------------------|------------------------|-------------|---------------|----------------|--------------|
| <i>Acinetobacter</i> spp.            | 1            |              | 2                | 3             | 5            | 7           | 1                            |                            | 1                      |             | 4             |                | 24           |
| <i>Aeromonas bestiarum</i>           |              |              |                  |               |              | 1           |                              |                            |                        |             |               |                | 1            |
| <i>Aeromonas hydrophila</i>          |              |              |                  |               |              | 1           |                              | 1                          |                        |             |               |                | 2            |
| <i>Aeromonas</i> spp.                |              | 1            | 4                | 5             | 3            | 5           | 1                            |                            | 1                      |             | 1             | 1              | 22           |
| <i>Arthrobacter</i> spp.             |              |              | 1                |               |              |             |                              |                            |                        |             |               |                | 1            |
| <i>Bacillus</i> spp.                 | 3            |              | 4                | 3             | 3            | 8           | 5                            | 1                          | 3                      |             | 2             |                | 32           |
| <i>Bacteroides ovatus</i>            |              |              | 1                |               |              |             |                              |                            |                        |             |               |                | 1            |
| <i>Buttiauxella gaviniae</i>         | 1            | 1            | 1                | 2             | 2            | 5           | 1                            |                            | 1                      |             | 1             |                | 15           |
| <i>Buttiauxella</i> spp.             | 1            |              | 2                |               | 1            | 1           | 1                            |                            |                        |             |               |                | 6            |
| <i>Candida albicans</i>              |              |              | 4                | 2             | 2            |             | 1                            |                            |                        | 1           |               |                | 10           |
| <i>Candida</i> spp.                  |              |              | 1                |               |              |             |                              |                            |                        |             |               |                | 1            |
| <i>Carnobacterium maltaromaticum</i> |              |              |                  | 1             | 2            | 7           |                              | 1                          | 2                      | 1           | 1             |                | 15           |
| <i>Cedecea</i> spp.                  |              |              |                  |               |              | 1           |                              |                            |                        |             |               |                | 1            |

| <b>Bacteria/ Fungi</b>                             | <b>Brain</b> | <b>Heart</b> | <b>Intestine</b> | <b>Kidney</b> | <b>Liver</b> | <b>Lung</b> | <b>Mesenteric lymph node</b> | <b>Reproductive system</b> | <b>Skeletal muscle</b> | <b>Skin</b> | <b>Spleen</b> | <b>Trachea</b> | <b>Total</b> |
|----------------------------------------------------|--------------|--------------|------------------|---------------|--------------|-------------|------------------------------|----------------------------|------------------------|-------------|---------------|----------------|--------------|
| <i>Citrobacter braakii</i>                         | 1            |              | 1                | 1             | 1            | 2           | 1                            |                            |                        | 1           | 1             |                | 9            |
| <i>Citrobacter freundii</i>                        |              |              |                  |               | 1            |             |                              |                            |                        |             |               |                | 1            |
| <i>Citrobacter gillenii</i>                        |              |              |                  |               |              | 1           |                              |                            |                        |             | 1             |                | 2            |
| <i>Clostridium septicum</i>                        |              |              | 2                |               | 1            | 1           | 1                            |                            |                        |             |               |                | 5            |
| <i>Clostridium baratii</i>                         |              |              | 1                |               |              | 1           |                              |                            |                        |             |               |                | 2            |
| <i>Clostridium perfringens</i><br>(non-typed)      | 3            |              | 12               | 1             | 3            | 4           | 2                            |                            |                        |             | 2             |                | 27           |
| <i>Clostridium sordellii</i>                       |              |              | 1                |               |              |             |                              |                            |                        |             |               |                | 1            |
| Coliform bacteria                                  |              |              |                  |               |              | 3           |                              |                            |                        |             |               |                | 3            |
| Coryneform bacteria<br>(not determinable)          |              |              |                  | 1             |              |             |                              | 1                          |                        |             |               |                | 2            |
| <i>Cronobacter</i> spp.                            | 1            |              |                  |               | 1            |             |                              |                            |                        |             | 1             |                | 3            |
| <i>Dermaococcus</i> spp.                           |              |              | 1                |               |              |             |                              |                            |                        |             |               |                | 1            |
| <i>Elisabethkingia miricola</i>                    |              |              |                  |               |              |             |                              | 1                          |                        |             |               |                | 1            |
| <i>Enterobacter asburiae</i>                       |              |              |                  |               |              | 1           |                              |                            |                        |             |               |                | 1            |
| <i>Enterobacter bugandensis</i>                    | 1            |              | 1                | 1             | 1            | 1           | 1                            |                            |                        |             | 1             |                | 7            |
| <i>Enterobacter cloacae</i>                        |              |              |                  | 1             | 1            | 2           |                              |                            |                        |             | 2             |                | 6            |
| <i>Enterobacter</i> spp.                           |              |              | 4                | 1             | 2            | 9           | 1                            |                            |                        | 1           | 2             | 1              | 21           |
| <i>Enterococcus faecalis</i>                       |              |              |                  |               |              | 3           |                              |                            |                        |             |               |                | 3            |
| <i>Enterococcus faecium</i>                        |              |              |                  |               |              | 1           |                              |                            |                        |             |               |                | 1            |
| <i>Enterococcus</i> spp.                           |              |              |                  | 1             | 1            | 12          |                              | 1                          |                        |             | 1             |                | 16           |
| <i>Erwinia</i> spp.                                |              |              | 1                | 1             | 1            | 3           |                              |                            |                        |             |               |                | 6            |
| <i>Escherichia coli</i>                            | 7            | 1            | 72               | 14            | 23           | 67          | 12                           | 3                          | 4                      |             | 18            |                | 221          |
| <i>Escherichia coli</i> var.<br><i>haemolytica</i> |              |              | 8                |               | 1            | 1           | 1                            |                            | 3                      |             |               |                | 14           |
| <i>Escherichia vulneris</i>                        |              |              |                  |               |              |             |                              |                            | 1                      |             |               |                | 1            |
| <i>Ewingella americana</i>                         |              |              | 2                |               | 2            | 4           | 1                            |                            |                        |             |               |                | 9            |
| <i>Flavobacterium</i> spp.                         |              |              | 1                |               |              |             |                              |                            |                        |             |               |                | 1            |
| Fungi (not determinable)                           |              |              | 5                |               |              | 1           |                              | 1                          |                        |             |               |                | 7            |
| <i>Fusobacterium</i> spp.                          |              |              |                  |               |              | 1           |                              |                            |                        |             |               | 1              | 2            |
| Gram-negative rod-shaped<br>bacteria               |              |              |                  | 1             | 1            |             |                              |                            |                        |             |               |                | 2            |
| Gram-positive rod-shaped<br>bacteria               |              |              |                  | 1             |              |             |                              |                            |                        |             | 1             |                | 2            |
| <i>Hafnia alvei</i>                                | 2            |              | 5                | 3             | 3            | 4           | 2                            | 1                          |                        |             | 3             |                | 23           |
| <i>Klebsiella pneumoniae</i>                       |              |              |                  |               |              | 1           |                              |                            |                        |             |               |                | 1            |
| <i>Klebsiella</i> spp.                             |              |              |                  |               |              | 3           |                              |                            |                        |             | 1             |                | 4            |
| <i>Kluyvera intermedia</i>                         | 2            |              | 1                | 1             | 1            | 2           | 1                            |                            |                        |             | 1             |                | 9            |

| <b>Bacteria/ Fungi</b>                                    | <b>Brain</b> | <b>Heart</b> | <b>Intestine</b> | <b>Kidney</b> | <b>Liver</b> | <b>Lung</b> | <b>Mesenteric lymph node</b> | <b>Reproductive system</b> | <b>Skeletal muscle</b> | <b>Skin</b> | <b>Spleen</b> | <b>Trachea</b> | <b>Total</b> |
|-----------------------------------------------------------|--------------|--------------|------------------|---------------|--------------|-------------|------------------------------|----------------------------|------------------------|-------------|---------------|----------------|--------------|
| <i>Lactobacillus raffinolactis</i>                        |              |              |                  |               |              | 1           |                              |                            |                        |             |               |                | 1            |
| <i>Lactococcus garvieae</i>                               |              |              |                  |               |              | 3           |                              |                            |                        |             |               |                | 3            |
| <i>Leclercia adecarboxylata</i>                           | 1            |              | 3                | 3             | 3            | 2           | 1                            |                            |                        |             |               |                | 13           |
| <i>Lelliottia amnigena</i>                                |              |              | 2                |               | 2            | 6           | 1                            |                            | 1                      |             | 2             |                | 14           |
| <i>Listeria monocytogenes</i>                             |              |              |                  |               | 1            | 1           |                              |                            |                        |             |               |                | 2            |
| <i>Mannheimia granulomatis</i>                            |              |              |                  | 1             | 1            | 2           |                              |                            |                        |             | 1             |                | 5            |
| <i>Mannheimia</i> spp.                                    |              |              |                  |               |              | 1           |                              |                            |                        |             |               |                | 1            |
| <i>Moellerella wisconsensis</i>                           |              |              |                  |               | 1            | 1           |                              |                            |                        |             |               |                | 2            |
| <i>Morganella morganii</i>                                |              |              | 2                |               |              | 4           | 1                            |                            |                        |             | 1             |                | 8            |
| <i>Mucor</i> spp.                                         |              |              | 2                |               |              |             |                              |                            |                        |             |               |                | 2            |
| <i>Myroides odoratimimus</i>                              |              |              |                  |               |              | 1           |                              |                            |                        |             |               |                | 1            |
| <i>Myroides</i> spp.                                      |              |              |                  |               |              | 2           |                              |                            |                        |             |               |                | 2            |
| Non-fermenting, gram-negative bacteria (not determinable) |              |              |                  |               | 1            | 5           |                              |                            |                        |             |               |                | 6            |
| <i>Pantoea agglomerans</i>                                |              |              |                  |               |              | 2           |                              |                            |                        | 1           |               |                | 3            |
| <i>Pantoea</i> spp.                                       | 2            | 1            | 3                | 3             | 3            | 22          | 1                            |                            | 4                      | 1           | 5             |                | 45           |
| <i>Pasteurella multocida</i>                              | 1            |              | 1                |               | 1            | 7           | 1                            |                            |                        |             | 2             | 1              | 14           |
| <i>Penicillium</i> spp.                                   |              |              |                  |               |              | 1           |                              |                            |                        |             |               |                | 1            |
| <i>Proteus</i> spp.                                       | 1            |              |                  | 3             | 5            | 8           | 1                            | 2                          | 3                      |             | 2             |                | 25           |
| <i>Providencia alcalifaciens</i>                          |              |              |                  |               |              | 1           |                              |                            |                        |             |               |                | 1            |
| <i>Providencia rettgeri</i>                               |              |              |                  | 1             |              | 1           |                              |                            |                        |             |               |                | 2            |
| <i>Providencia</i> spp.                                   |              |              |                  |               |              | 1           |                              |                            |                        |             |               |                | 1            |
| <i>Pseudomonas aeruginosa</i>                             |              |              |                  |               |              | 2           |                              |                            | 1                      |             |               |                | 3            |
| <i>Pseudomonas antarctica</i>                             |              |              |                  |               |              | 2           |                              |                            |                        |             |               |                | 2            |
| <i>Pseudomonas extremorientalis</i>                       |              |              |                  |               |              | 1           |                              |                            |                        |             |               |                | 1            |
| <i>Pseudomonas fluorescens</i>                            |              |              |                  |               |              | 1           |                              |                            |                        |             |               |                | 1            |
| <i>Pseudomonas fragi</i>                                  |              |              |                  |               |              | 2           |                              |                            |                        |             |               |                | 2            |
| <i>Pseudomonas koreensis</i>                              |              |              |                  |               |              | 6           |                              |                            |                        |             |               |                | 6            |
| <i>Pseudomonas libanensis</i>                             |              |              |                  |               |              | 1           |                              |                            |                        |             |               |                | 1            |
| <i>Pseudomonas lundensis</i>                              |              |              |                  |               |              | 2           |                              |                            |                        |             |               |                | 2            |
| <i>Pseudomonas nitroreducens</i>                          |              |              |                  |               |              |             |                              | 1                          | 2                      |             | 2             |                | 5            |
| <i>Pseudomonas rhodesiae</i>                              |              |              |                  |               |              | 2           |                              |                            |                        |             |               |                | 2            |
| <i>Pseudomonas</i> spp.                                   | 2            |              | 14               | 5             | 9            | 49          | 6                            | 2                          |                        | 2           | 5             | 1              | 95           |
| <i>Pseudomonas synxantha</i>                              |              |              |                  |               |              |             |                              |                            |                        | 1           |               |                | 1            |
| <i>Pseudomonas viridiflava</i>                            |              |              |                  |               |              | 1           |                              |                            |                        |             |               |                | 1            |
| <i>Rahnella aquatilis</i>                                 | 3            |              | 12               | 3             | 5            | 12          | 5                            | 1                          |                        | 2           | 2             | 1              | 46           |

| <b>Bacteria/ Fungi</b>                            | <b>Brain</b> | <b>Heart</b> | <b>Intestine</b> | <b>Kidney</b> | <b>Liver</b> | <b>Lung</b> | <b>Mesenteric lymph node</b> | <b>Reproductive system</b> | <b>Skeletal muscle</b> | <b>Skin</b> | <b>Spleen</b> | <b>Trachea</b> | <b>Total</b> |
|---------------------------------------------------|--------------|--------------|------------------|---------------|--------------|-------------|------------------------------|----------------------------|------------------------|-------------|---------------|----------------|--------------|
| <i>Raoultella ornithinolytica</i>                 |              |              |                  |               |              |             |                              | 1                          |                        |             | 1             |                | 2            |
| <i>Raoultella</i> spp.                            |              |              |                  |               |              | 2           |                              |                            |                        |             |               |                | 2            |
| <i>Serratia fonticola</i>                         |              |              | 6                | 3             | 2            | 9           |                              |                            | 2                      |             | 3             |                | 25           |
| <i>Serratia liquefaciens</i>                      | 2            |              | 5                | 4             | 4            | 11          | 4                            | 1                          |                        |             | 4             |                | 35           |
| <i>Serratia marcescens</i>                        |              |              |                  |               |              |             |                              | 1                          | 1                      |             |               |                | 2            |
| <i>Serratia plymuthica</i>                        |              |              | 1                | 1             |              | 4           |                              |                            |                        |             |               |                | 6            |
| <i>Serratia proteamaculans</i>                    |              |              |                  |               |              | 1           |                              |                            |                        |             |               |                | 1            |
| <i>Serratia</i> spp.                              | 1            |              | 3                | 3             | 5            | 7           | 1                            |                            |                        |             | 1             | 1              | 22           |
| <i>Sphingobacterium</i> spp.                      |              |              |                  |               |              | 2           |                              |                            |                        |             |               |                | 2            |
| <i>Staphylococcus</i> spp.,<br>coagulase-negative |              |              |                  |               | 2            | 5           |                              |                            | 3                      |             |               |                | 10           |
| <i>Staphylococcus aureus</i>                      | 1            | 1            |                  | 4             | 2            | 8           |                              |                            | 4                      | 6           | 2             |                | 28           |
| <i>Staphylococcus lutetiensis</i>                 |              |              |                  |               |              | 1           |                              |                            |                        |             |               |                | 1            |
| <i>Staphylococcus sciuri</i>                      | 1            |              | 1                | 1             | 1            |             | 1                            |                            |                        |             |               |                | 5            |
| <i>Staphylococcus</i> spp.                        | 1            |              | 1                | 1             |              | 1           |                              |                            |                        |             | 1             |                | 5            |
| <i>Staphylococcus xylosus</i>                     |              |              |                  | 1             |              | 1           | 1                            |                            |                        |             | 1             |                | 4            |
| <i>Stenotrophomonas maltophilia</i>               |              |              | 1                |               |              |             | 1                            |                            |                        |             |               |                | 2            |
| <i>Stenotrophomonas</i> spp.                      | 1            |              |                  |               |              | 4           |                              |                            |                        |             | 1             |                | 6            |
| <i>Streptococcus</i> spp., $\alpha$ -haem.        | 1            |              | 9                | 6             | 7            | 20          | 3                            | 1                          |                        |             | 4             |                | 51           |
| <i>Streptococcus</i> spp., $\beta$ -haem.         |              |              |                  | 1             |              | 1           |                              |                            |                        |             |               |                | 2            |
| <i>Streptococcus canis</i>                        | 1            |              |                  | 1             | 1            | 1           | 1                            |                            |                        |             | 1             |                | 6            |
| <i>Streptococcus gallolyticus</i>                 |              |              |                  | 1             |              |             |                              |                            |                        |             | 1             |                | 2            |
| <i>Streptococcus</i> spp., $\gamma$ -haem.        | 4            |              | 7                | 6             | 8            | 16          | 4                            | 2                          | 1                      |             | 5             |                | 53           |
| <i>Yarrowia lipolytica</i>                        | 1            |              | 7                | 2             |              | 4           | 2                            |                            |                        |             |               |                | 16           |
| Yeast (not further determined)                    | 1            |              | 16               | 4             | 5            | 13          | 6                            |                            |                        |             | 4             | 1              | 50           |
| <i>Yersinia enterocolitica</i>                    |              |              |                  |               |              | 3           |                              |                            |                        |             |               |                | 3            |
| <i>Yersinia pseudotuberculosis</i>                |              |              | 8                | 4             | 6            | 8           | 2                            | 1                          |                        | 1           | 3             |                | 33           |
| <b>Total</b>                                      | <b>48</b>    | <b>5</b>     | <b>242</b>       | <b>106</b>    | <b>137</b>   | <b>439</b>  | <b>76</b>                    | <b>24</b>                  | <b>38</b>              | <b>18</b>   | <b>98</b>     | <b>8</b>       | <b>1239</b>  |
